# Supplementary material
Source: PubMed Central journal article supplement (PMC2494777)

**Supplemental Figure 1: *The effects of TGF- $\beta$ 1 on bovine pulmonary artery endothelial cell apoptosis induced by blockade of VEGF receptors.*** Panel a: BPAEC were incubated in MEM plus 10% FBS with vehicle or SU5416 (5  $\mu$ M) in the absence or presence of TGF- $\beta$ 1 (1 ng/ml) for 24, 48, and 72 h. Panel b: BPAEC were incubated in MEM plus 10% FBS with various concentrations (0, 0.1, 0.5, 5.0 and 10  $\mu$ M) of SU5416 in the absence or presence of TGF- $\beta$ 1 (1 ng/ml) for 48h. Caspase-3 activities were assessed by enzyme activity assay. \*  $p < 0.001$  vs BPAEC exposed to vehicle; ‡  $p < 0.001$  vs BPAEC exposed to SU5416 in the absence of TGF- $\beta$ 1. Panel c: BPAEC were incubated with vehicle or SU5416 (5  $\mu$ M) in the absence or presence of TGF- $\beta$  (1 ng/ml) in MEM plus 10% FBS for 48h and caspase-3 cleavage was assessed by immunoblot analysis using an antibody recognizing both procaspase-3 and the cleaved caspase-3. The protein level of vinculin was used to control for protein loading. Panels a and b: all data are presented as the mean  $\pm$  SE from three independent experiments. Panel c: a representative blot from three independent experiments is shown.

**Supplemental Figure 2: *The effect of TGF- $\beta$ 1 on apoptosis of human pulmonary artery endothelial cells.*** HPAEC were incubated with EBM2 medium in the absence or presence of varying concentrations of TGF- $\beta$ 1 for 24h and caspase-3 activation was assessed by immunoblot analysis using antibodies recognizing procaspase-3 and the cleaved caspase-3, respectively. The protein level of vinculin was used to control for protein loading. A representative blot from three independent experiments is shown.

# Supplemental Figure 1

a.

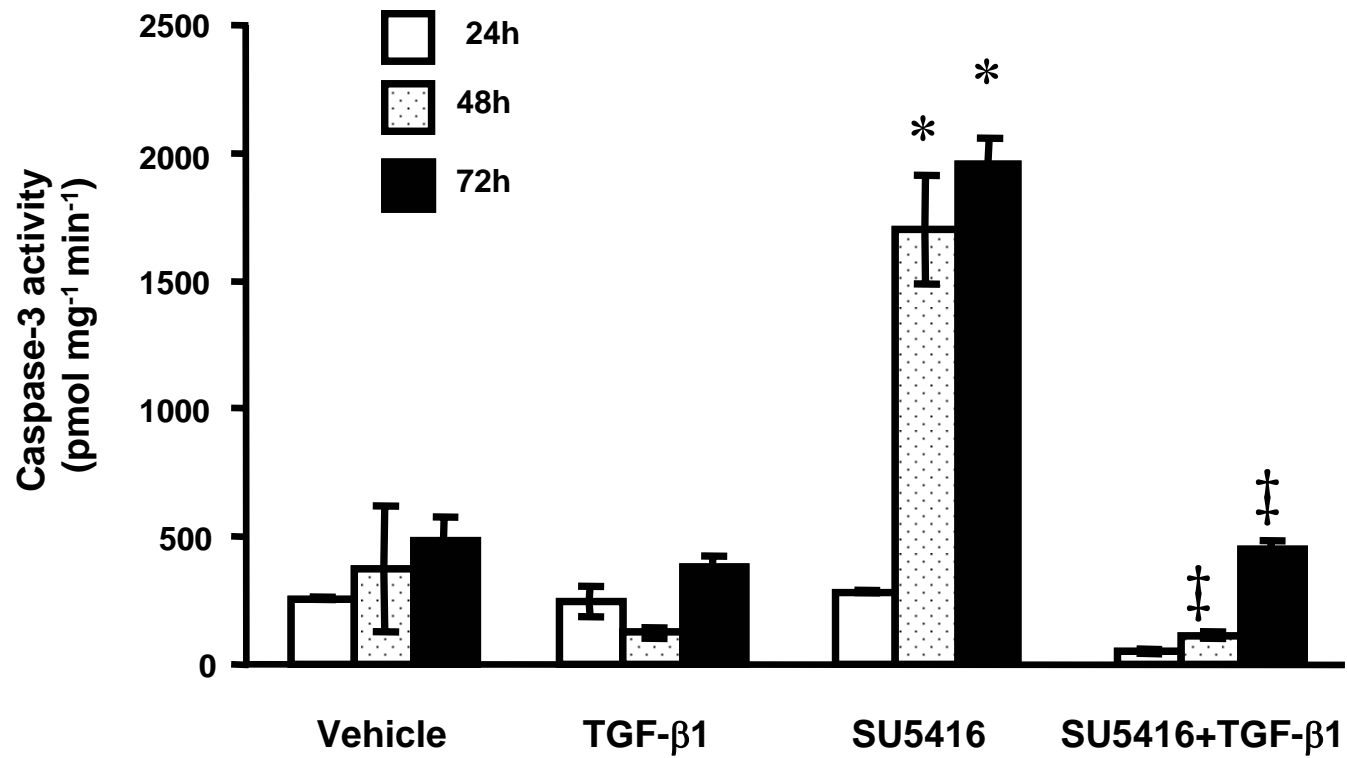

# Supplemental Figure 1

**b.**

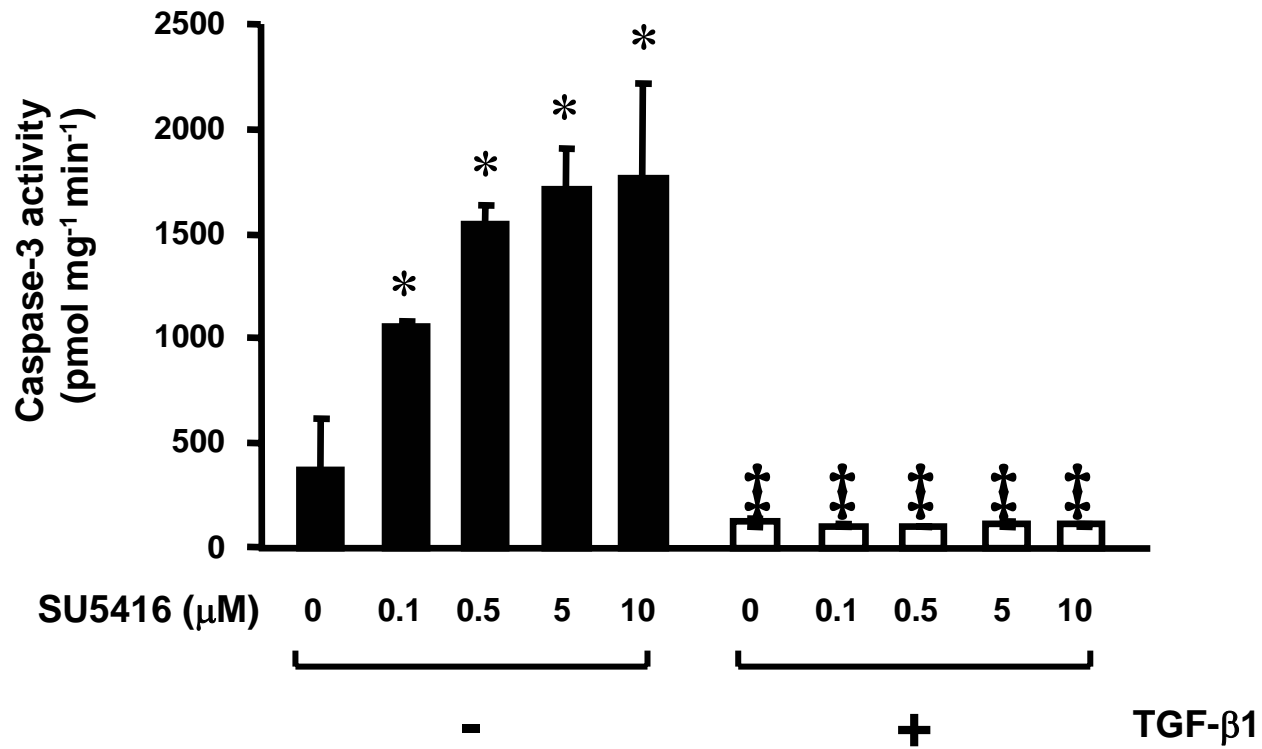

# Supplemental Figure 1

**C.**

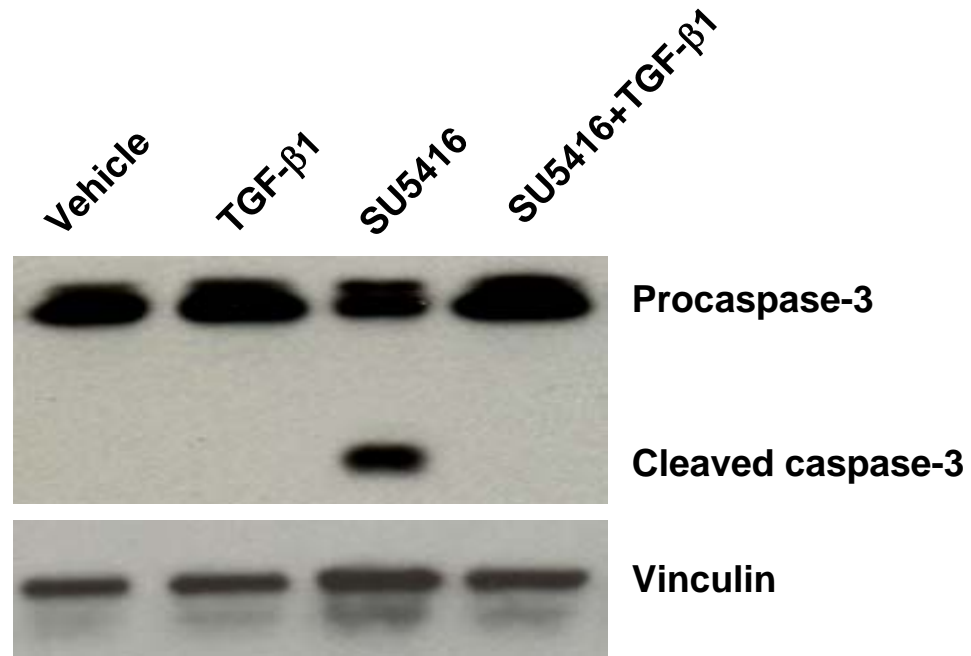

# Supplemental Figure 2

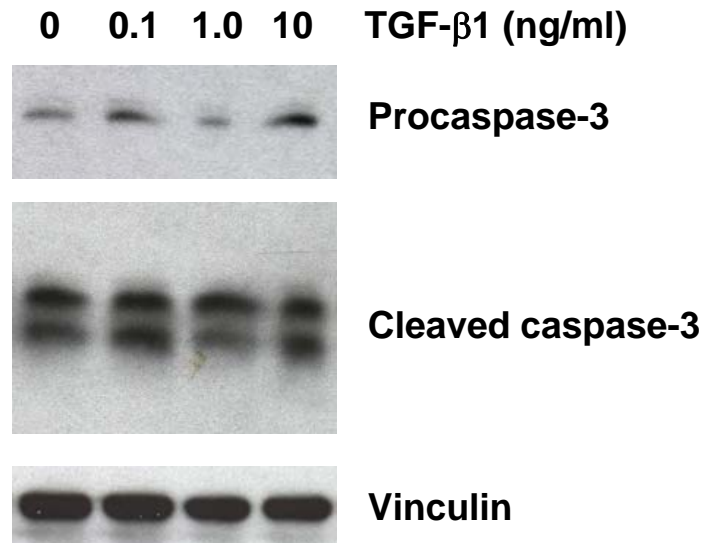

Supplement: 00402.2007_1.pdf [file 00402.2007_1.pdf]
